# Supplementary material for: Water-soluble Cit-NaYbF4:Tm3+with enhanced 802 nm emission by Sr2+ion doping forin vivofluorescence molecular tomography
Source: Royal Society of Chemistry journal article supplement (doi:10.1039/d2tc03452b), 2022-01-01
Supplement: d2tc03452b1.pdf [file d2tc03452b1.pdf]

### Supplementary Material

#### Water-soluble Cit-NaYbF<sub>4</sub>:Tm<sup>3+</sup> with enhanced 802 nm emission by Sr<sup>2+</sup> ions doping for *in vivo* fluorescence molecular tomography

Xiaoli Luo<sup>a,b</sup>, Qichen Chen<sup>a</sup>, Hongbo Guo<sup>a</sup>, Chen Cheng<sup>a</sup>, Qianqian Ren<sup>a</sup>, Heng Zhang<sup>a</sup>, Xiaowei He<sup>a,\*</sup>, Wu Zhao<sup>a,\*</sup>

<sup>a</sup>School of Information Science and Technology, Northwest University, Xi'an, Shaanxi 710127, China.

<sup>b</sup>School of Mathematics and Computer Science, Ningxia Normal University, Guyuan, Ningxia 756099, China.

\* Corresponding author: Dr. Wu Zhao, Tel: +86 29 88308280. E-mail: [zhaowu@nwu.edu.cn](mailto:zhaowu@nwu.edu.cn)

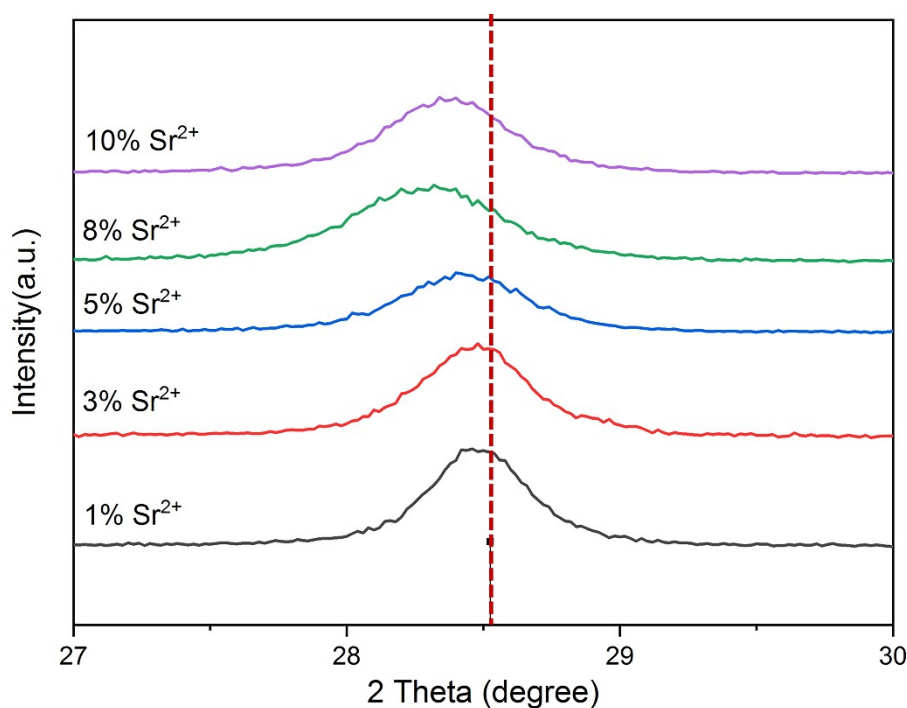

**Figure S1:** The magnified XRD patterns of NaYbF<sub>4</sub>:2%Tm<sup>3+</sup>/x%Sr<sup>2+</sup> (x = 1, 3, 5, 8, and 10).

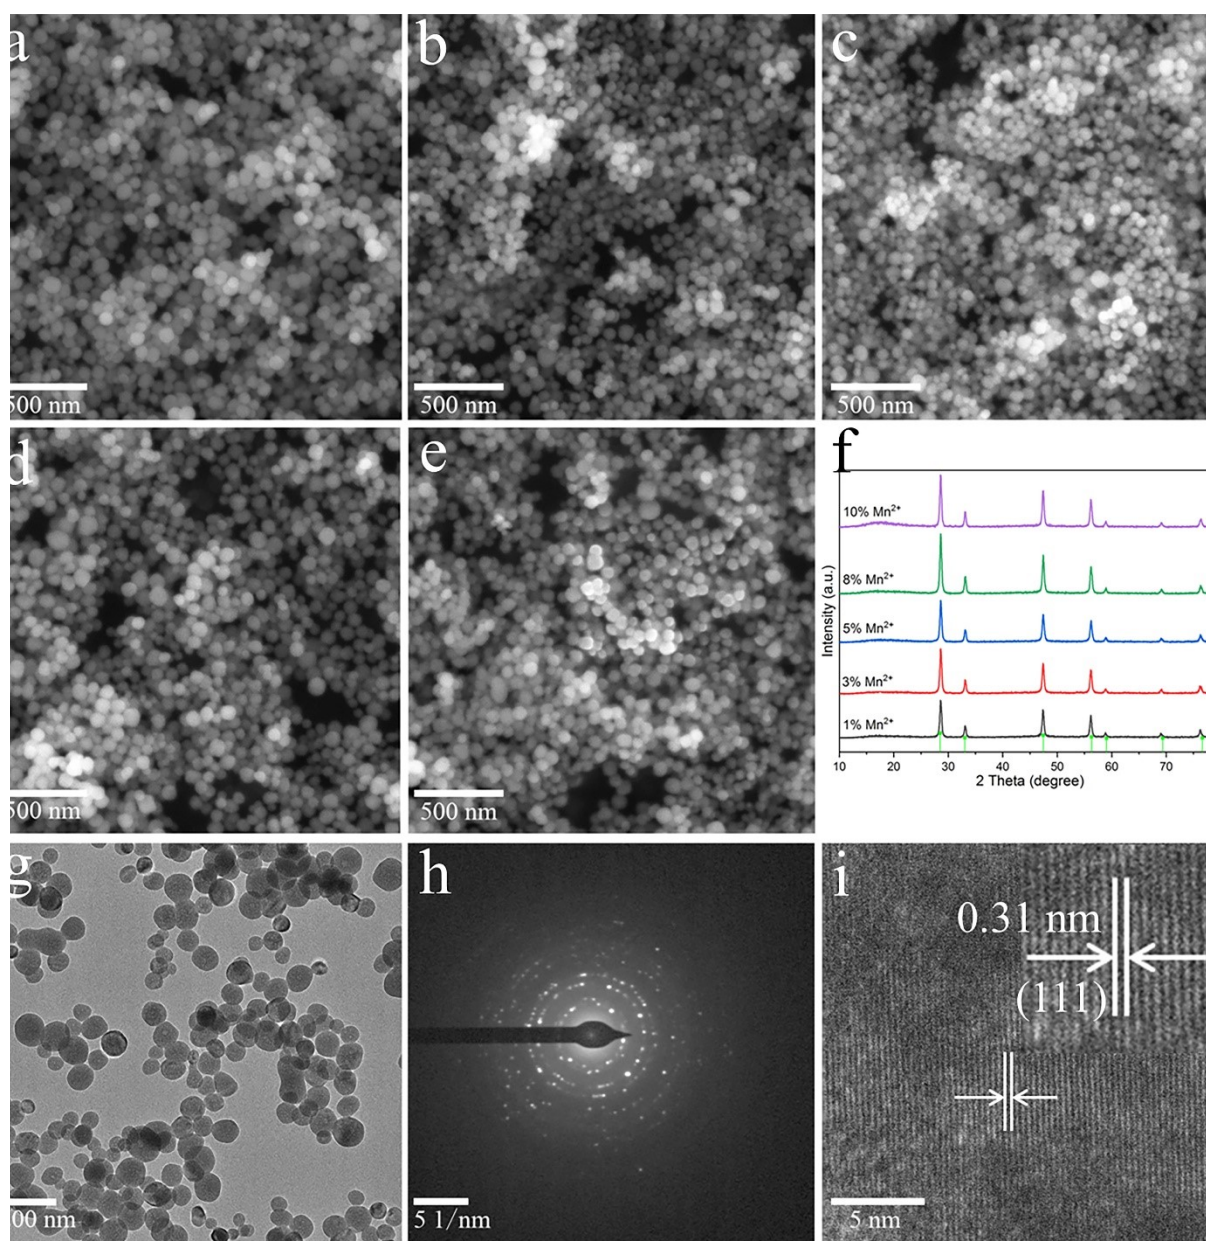

**Figure S2: Analysis of  $\text{NaYbF}_4:2\%\text{Tm}^{3+}/x\%\text{Mn}^{2+}$  crystals.** SEM images of  $\text{NaYb}_{0.98-x}\text{F}_4:2\%\text{Tm}^{3+}/x\%\text{Mn}^{2+}$  crystals synthesized with (a)  $x = 1$ ; (b)  $x = 3$ ; (c)  $x = 5$ ; (d)  $x = 8$ ; (e)  $x = 10$ ; (f) XRD patterns of  $\text{NaYbF}_4:2\%\text{Tm}^{3+}/x\%\text{Mn}^{2+}$  ( $x = 1, 3, 5, 8,$  and  $10$ ). (g) the TEM image of  $\text{NaYbF}_4:2\%\text{Tm}^{3+}/5\%\text{Mn}^{2+}$ ; (h) the SAED pattern of  $\text{NaYbF}_4:2\%\text{Tm}^{3+}/5\%\text{Mn}^{2+}$ ; (i) the corresponding HRTEM image of  $\text{NaYbF}_4:2\%\text{Tm}^{3+}/5\%\text{Mn}^{2+}$ .

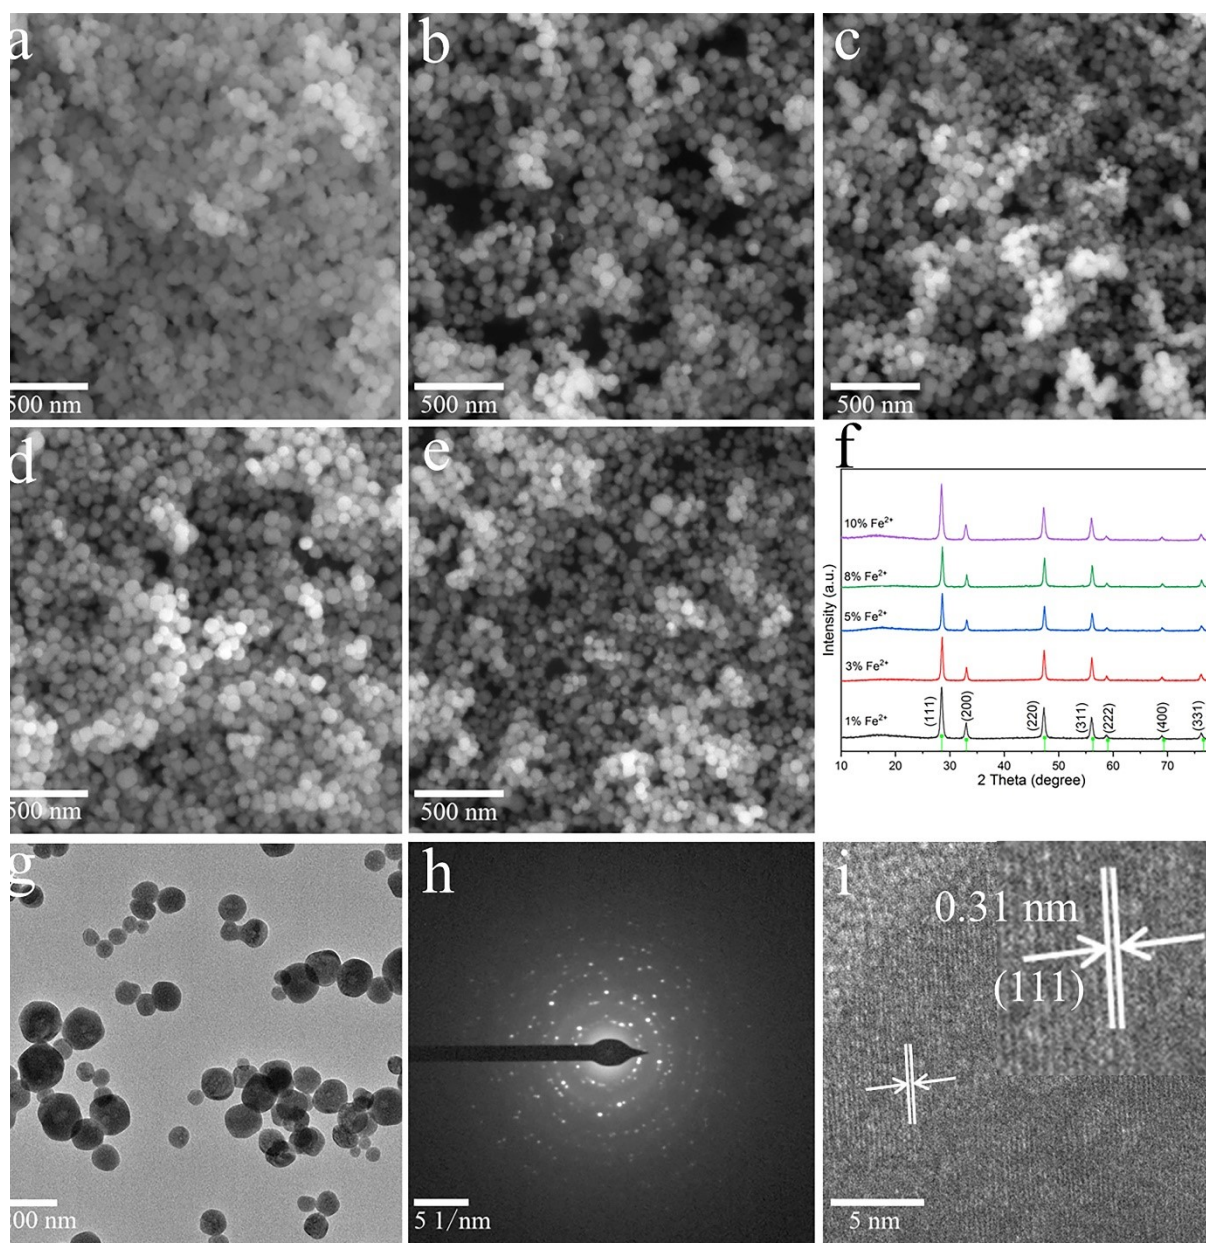

**Figure S3: Analysis of  $\text{NaYbF}_4:2\%\text{Tm}^{3+}/x\%\text{Fe}^{2+}$  crystals.** SEM images of  $\text{NaYb}_{0.98-x}\text{F}_4:2\%\text{Tm}^{3+}/x\%\text{Fe}^{2+}$  crystals synthesized with (a)  $x = 1$ ; (b)  $x = 3$ ; (c)  $x = 5$ ; (d)  $x = 8$ ; (e)  $x = 10$ ; (f) XRD patterns of  $\text{NaYbF}_4:2\%\text{Tm}^{3+}/x\%\text{Fe}^{2+}$  ( $x = 1, 3, 5, 8,$  and  $10$ ). (g) the TEM image of  $\text{NaYbF}_4:2\%\text{Tm}^{3+}/5\%\text{Fe}^{2+}$ ; (h) the SAED pattern of  $\text{NaYbF}_4:2\%\text{Tm}^{3+}/5\%\text{Fe}^{2+}$ ; (i) the corresponding HRTEM image of  $\text{NaYbF}_4:2\%\text{Tm}^{3+}/5\%\text{Fe}^{2+}$ .

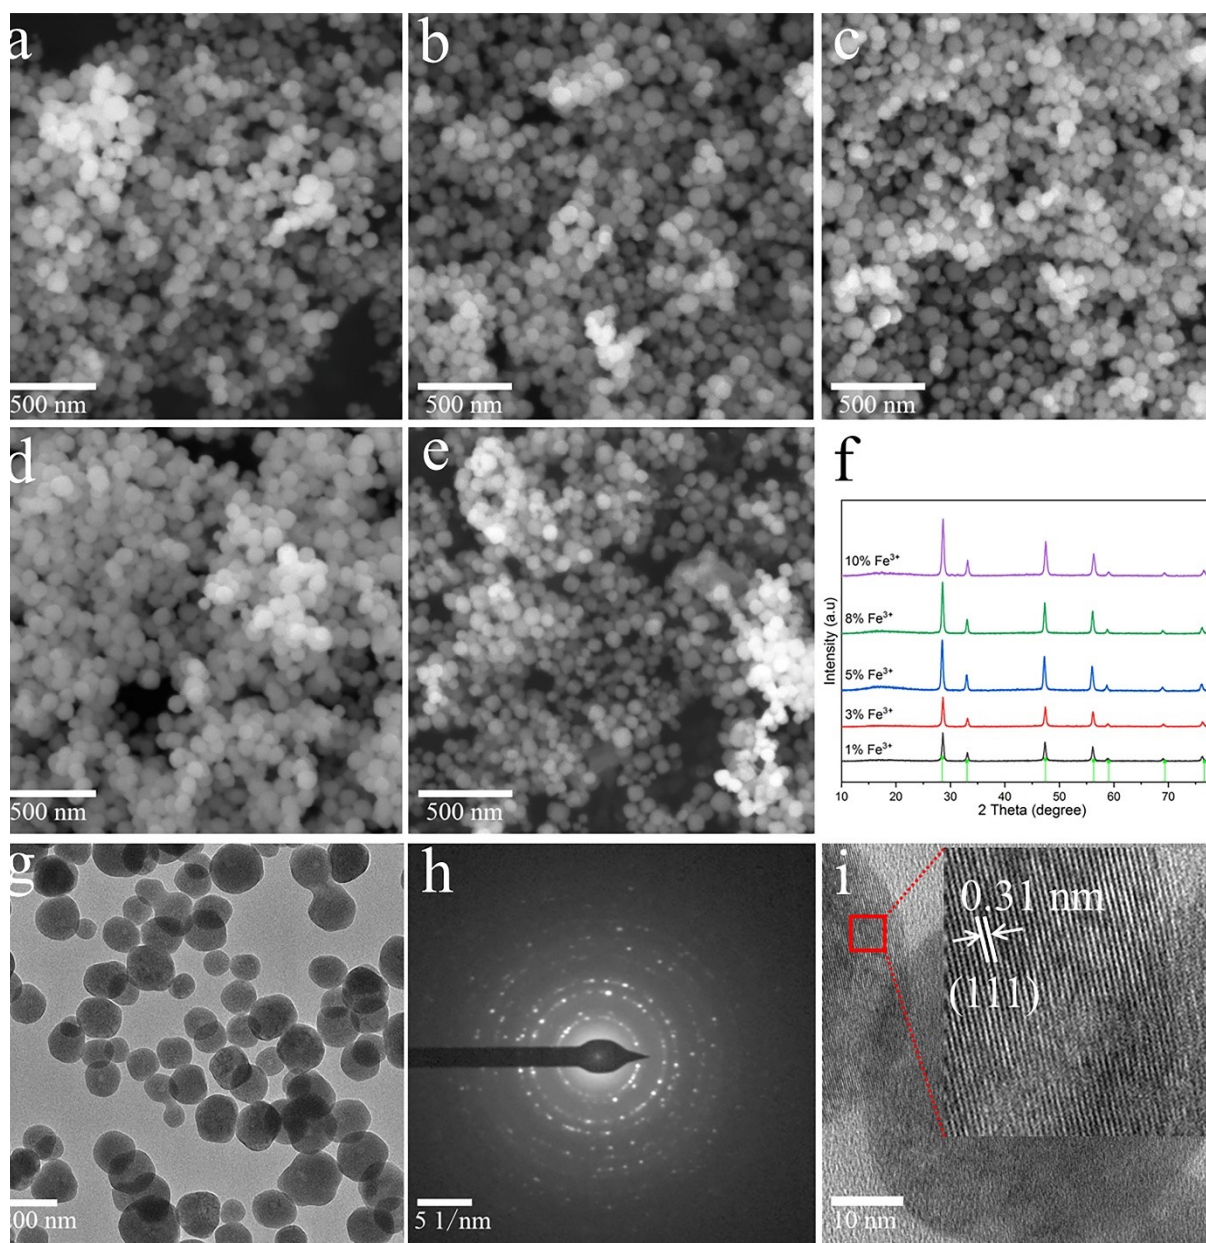

**Figure S4: Analysis of  $\text{NaYbF}_4:2\%\text{Tm}^{3+}/x\%\text{Fe}^{3+}$  crystals.** SEM images of  $\text{NaYb}_{0.98-x}\text{F}_4:2\%\text{Tm}^{3+}/x\%\text{Fe}^{3+}$  crystals synthesized with (a)  $x = 1$ ; (b)  $x = 3$ ; (c)  $x = 5$ ; (d)  $x = 8$ ; (e)  $x = 10$ ; (f) XRD patterns of  $\text{NaYbF}_4:2\%\text{Tm}^{3+}/x\%\text{Fe}^{3+}$  ( $x = 1, 3, 5, 8,$  and  $10$ ). (g) the TEM image of  $\text{NaYbF}_4:2\%\text{Tm}^{3+}/5\%\text{Fe}^{3+}$ ; (h) the SAED pattern of  $\text{NaYbF}_4:2\%\text{Tm}^{3+}/5\%\text{Fe}^{3+}$ ; (i) the corresponding HRTEM image of  $\text{NaYbF}_4:2\%\text{Tm}^{3+}/5\%\text{Fe}^{3+}$ .

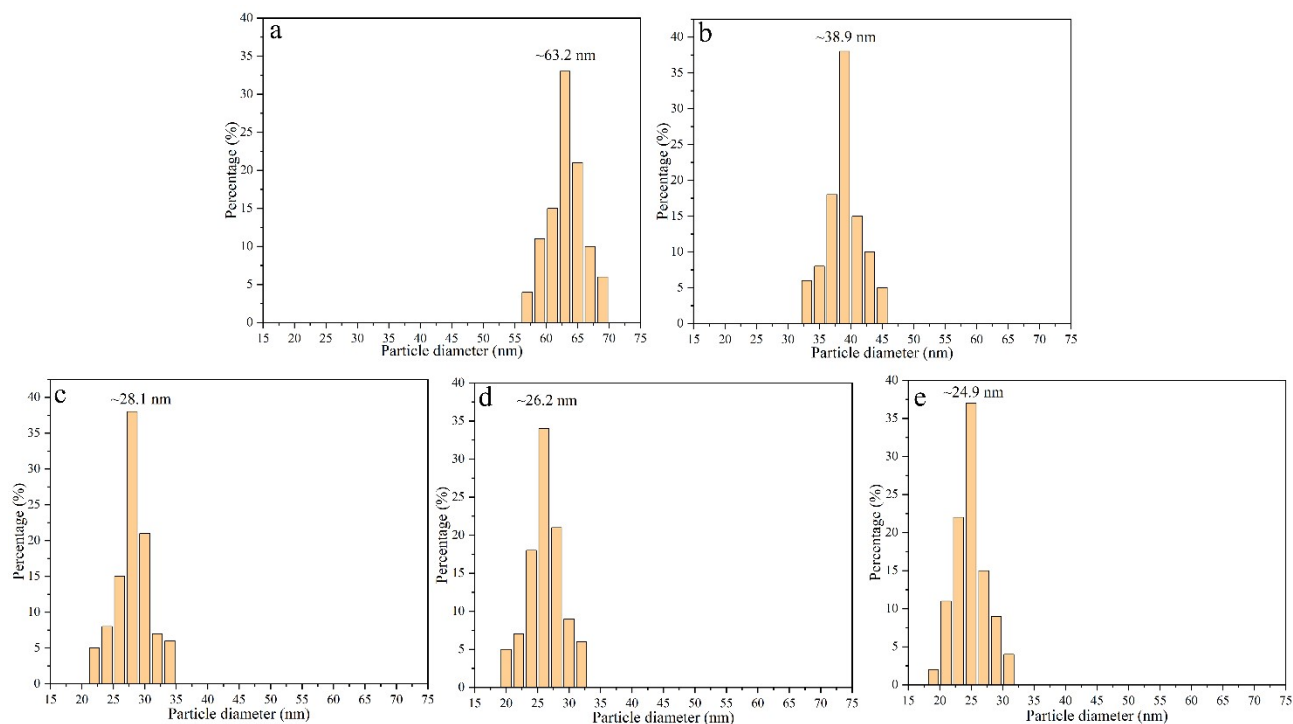

**Fig. S5:** Size histograms of NaYb<sub>0.98-x</sub>F<sub>4</sub>:2%Tm<sup>3+</sup>/x%Sr<sup>2+</sup> crystals synthesized with (a) x = 1; (b) x = 3; (c) x = 5; (d) x = 8; (e) x = 10.

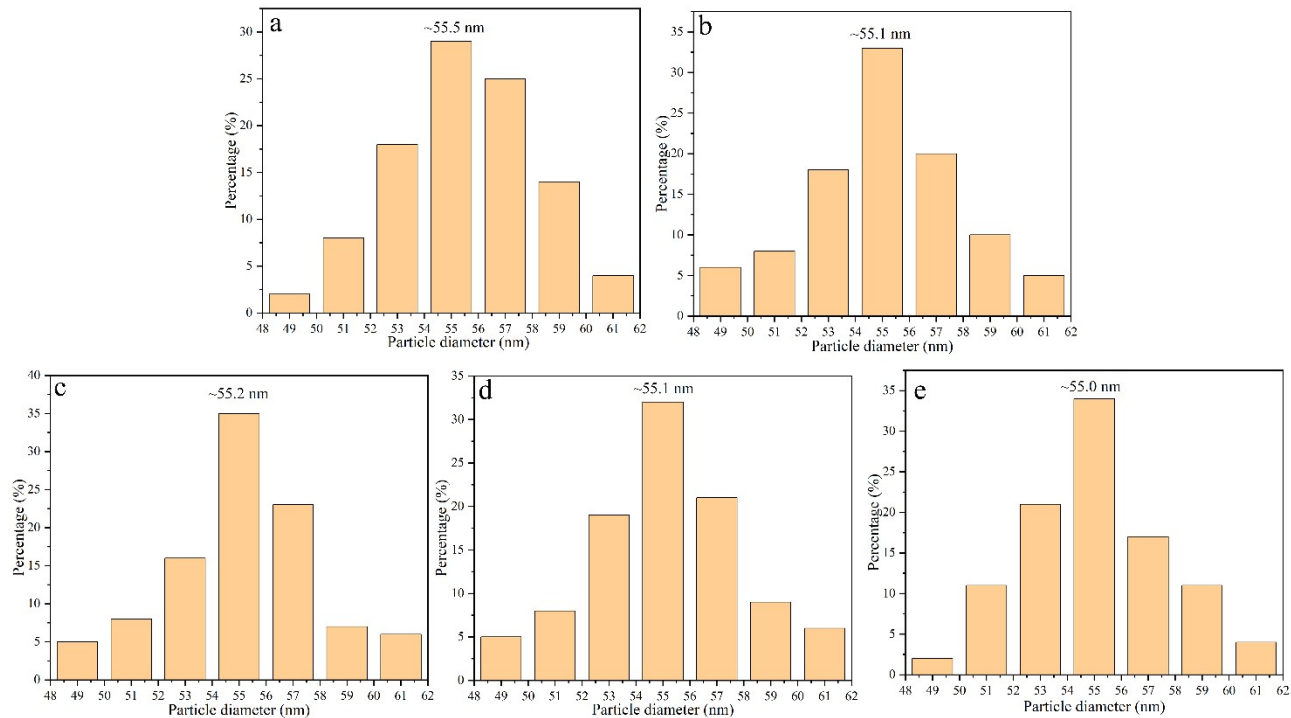

**Fig. S6:** Size histograms of NaYb<sub>0.98-x</sub>F<sub>4</sub>:2%Tm<sup>3+</sup>/x%Mn<sup>2+</sup> crystals synthesized with (a) x = 1; (b) x = 3; (c) x = 5; (d) x = 8; (e) x = 10.

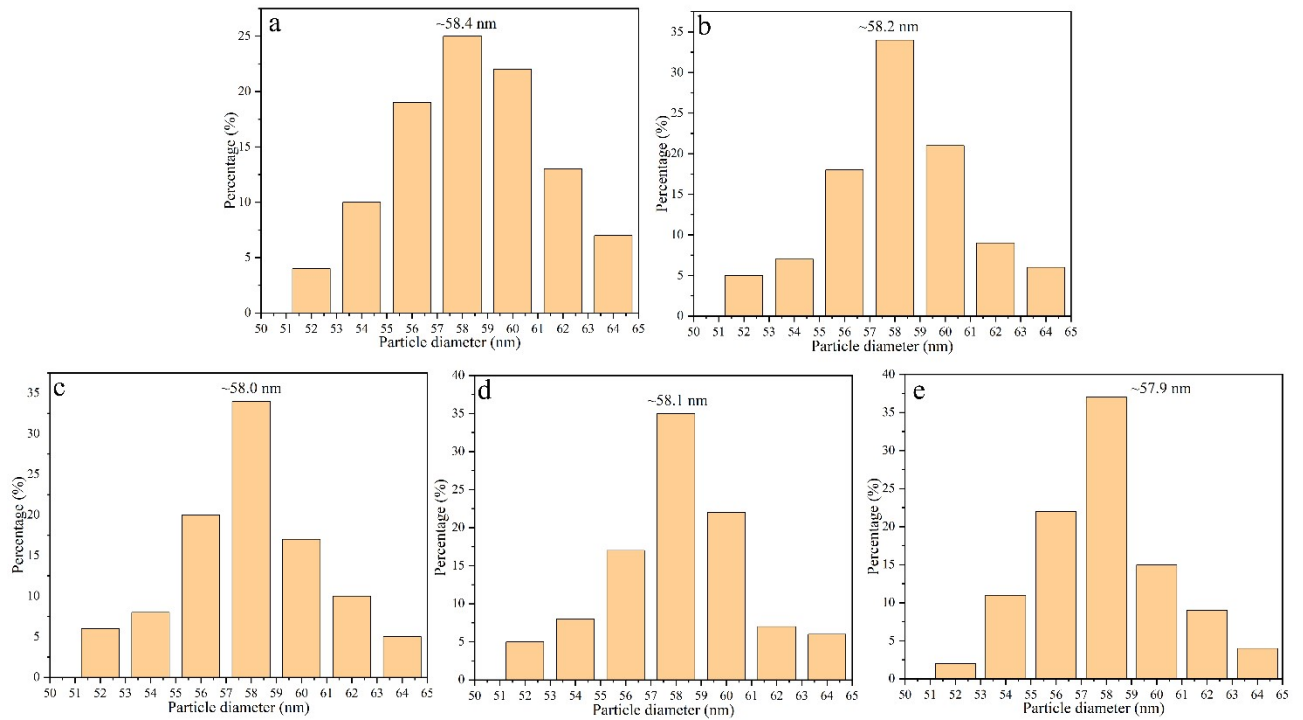

**Fig. S7:** Size histograms of NaYb<sub>0.98-x</sub>F<sub>4</sub>:2%Tm<sup>3+</sup>/x%Fe<sup>2+</sup> crystals synthesized with (a)  $x = 1$ ; (b)  $x = 3$ ; (c)  $x = 5$ ; (d)  $x = 8$ ; (e)  $x = 10$ .

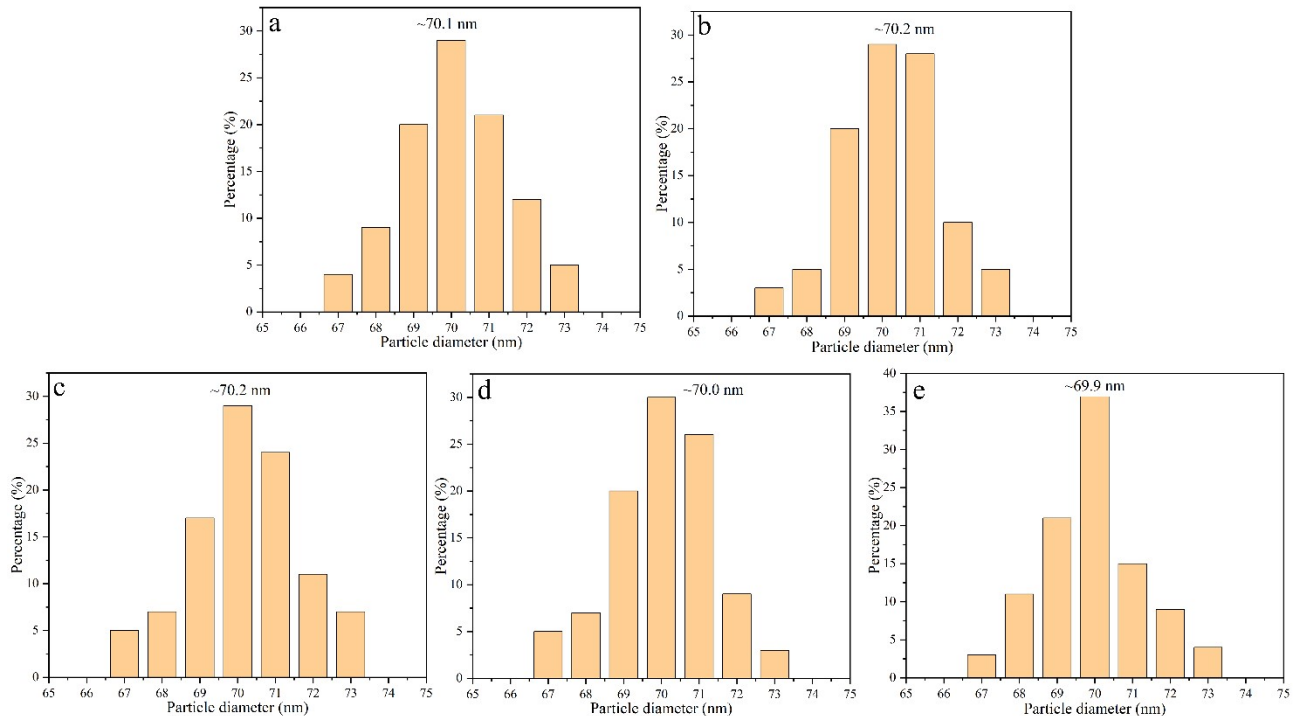

**Fig. S8:** Size histograms of NaYb<sub>0.98-x</sub>F<sub>4</sub>:2%Tm<sup>3+</sup>/x%Fe<sup>3+</sup> crystals synthesized with (a)  $x = 1$ ; (b)  $x = 3$ ; (c)  $x = 5$ ; (d)  $x = 8$ ; (e)  $x = 10$ .

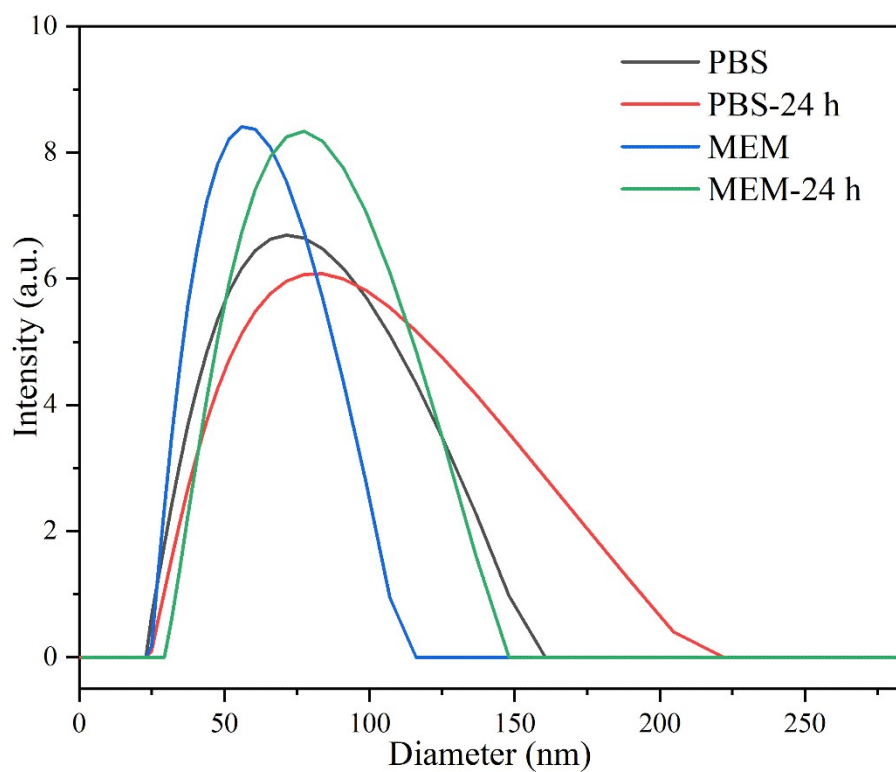

**Fig. S9** DLS of prepared Cit-NaYbF<sub>4</sub>:2%Tm<sup>3+</sup>/5%Sr<sup>2+</sup>.

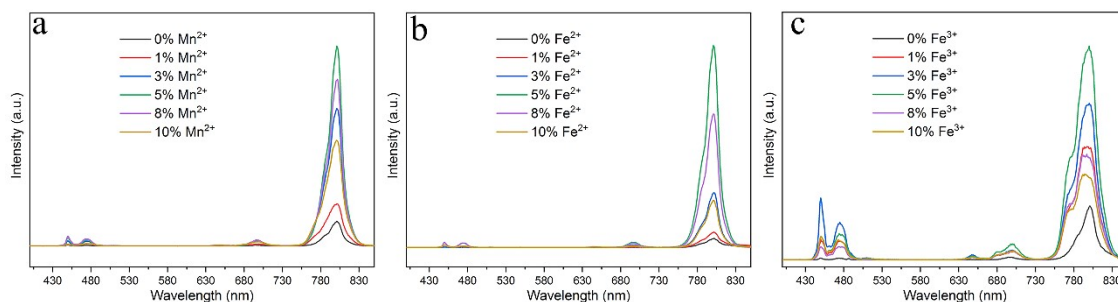

**Figure S10:** The UC luminescence spectra of the samples generated with different ions doping at different doping molar ratios. (a) NaYbF<sub>4</sub>:2%Tm<sup>3+</sup>/x%Mn<sup>2+</sup> (x = 0, 1, 3, 5, 8, and 10), (b) NaYbF<sub>4</sub>:2%Tm<sup>3+</sup>/x%Fe<sup>2+</sup> (x = 0, 1, 3, 5, 8, and 10), (c) NaYbF<sub>4</sub>:2%Tm<sup>3+</sup>/x%Fe<sup>3+</sup> (x = 0, 1, 3, 5, 8, and 10).

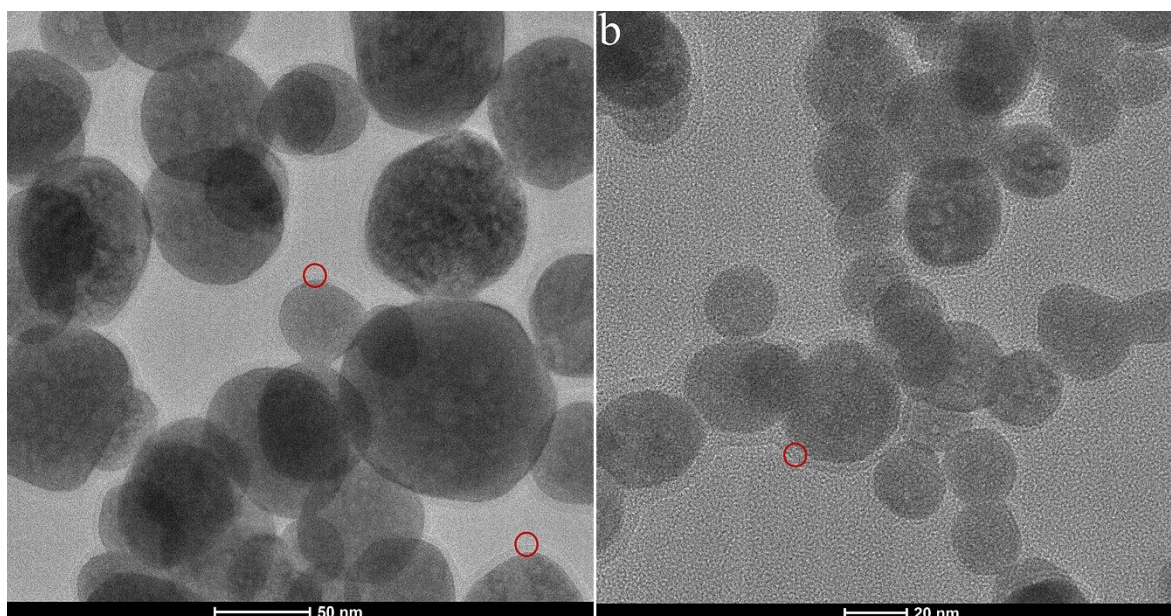

**Figure S11: Higher-magnification TEM image** of (a)  $\text{NaYbF}_4:2\%\text{Tm}^{3+}$ ; (b)  $\text{NaYbF}_4:2\%\text{Tm}^{3+}/5\%\text{Sr}^{2+}$ . The transparent areas circled in red represent the surface of these UCNPs coated with water-soluble organic ligands

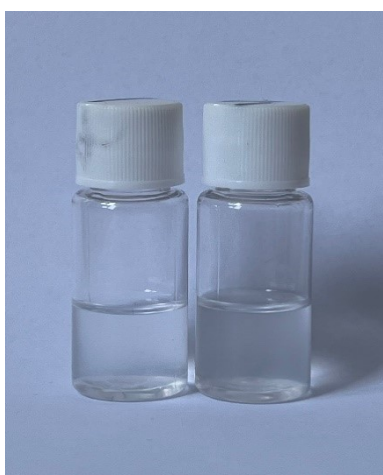

**Figure S12: Aqueous solution of UCNPs at a concentration of 400  $\mu\text{g}/\text{mL}$  at room temperature.** (left)  $\text{NaYbF}_4:2\%\text{Tm}^{3+}/5\%\text{Sr}^{2+}$ ; (right)  $\text{NaYbF}_4:2\%\text{Tm}^{3+}$ .



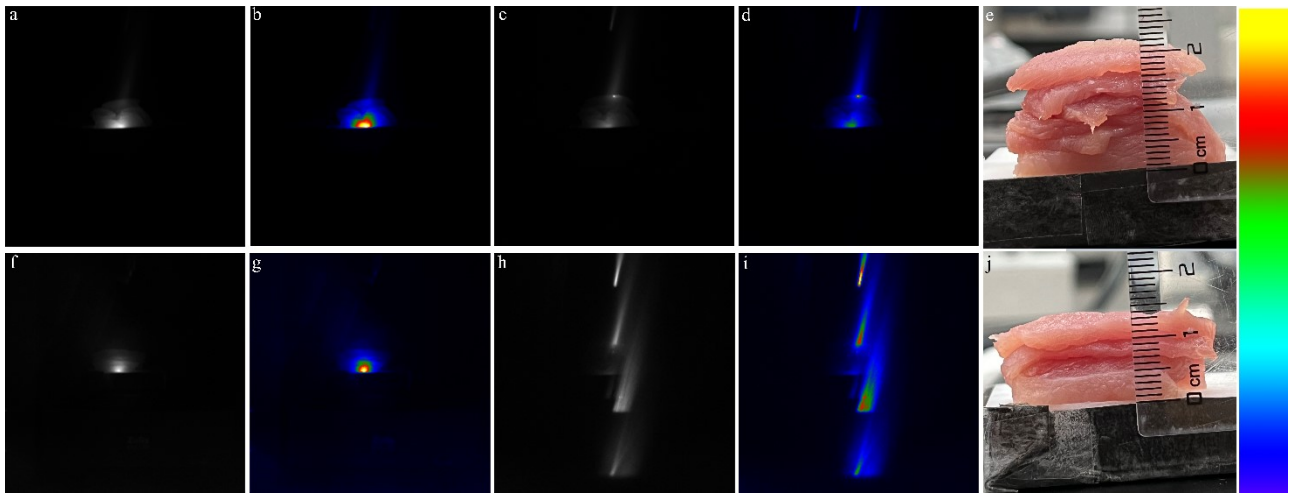

**Fig. S13 Fluorescence signal detection** of pork muscle tissues treated with different fluorescence probes in different depths. **(a-e)** 2 mg/mL Cit-NaYbF<sub>4</sub>:2%Tm<sup>3+</sup>/5%Sr<sup>2+</sup>; **(f-j)** 0.1 mg/mL Indocyanine Green (ICG). **(a)** 20 mm; **(b)** 20 mm with energy; **(c)** 21 mm; **(d)** 21 mm with energy; **(e)** 20 mm of pork muscle tissues treated with 2 mg/mL Cit-NaYbF<sub>4</sub>:2%Tm<sup>3+</sup>/5%Sr<sup>2+</sup>; **(f)** 13 mm; **(g)** 13 mm with energy; **(h)** 14 mm; **(i)** 14 mm with energy; **(j)** 13 mm of pork muscle tissues treated with 0.1 mg/mL ICG.

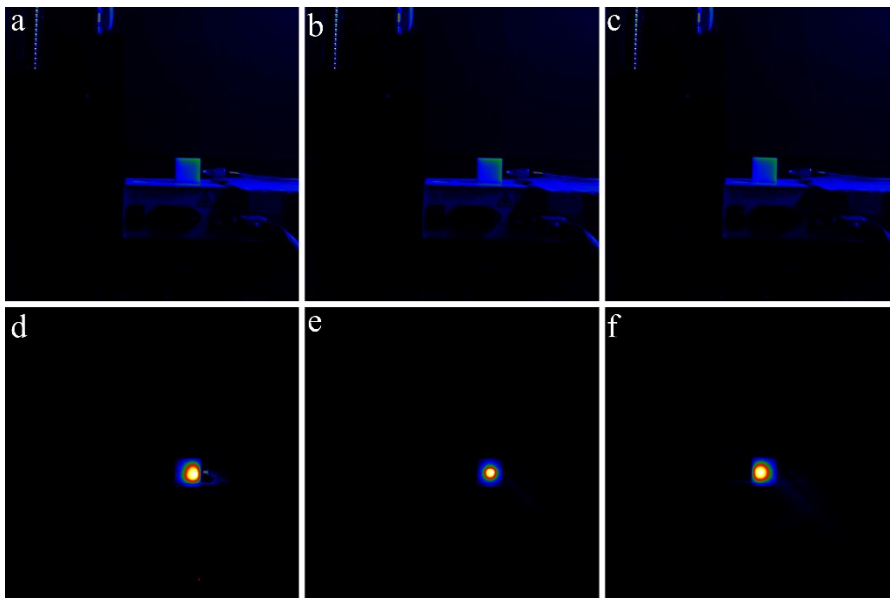

**Figure S14: Fluorescence molecular tomography (FMT) imaging in phantom at different faces.** **(a-c)** Bright field images. **(d-e)** Upconversion luminescence images.

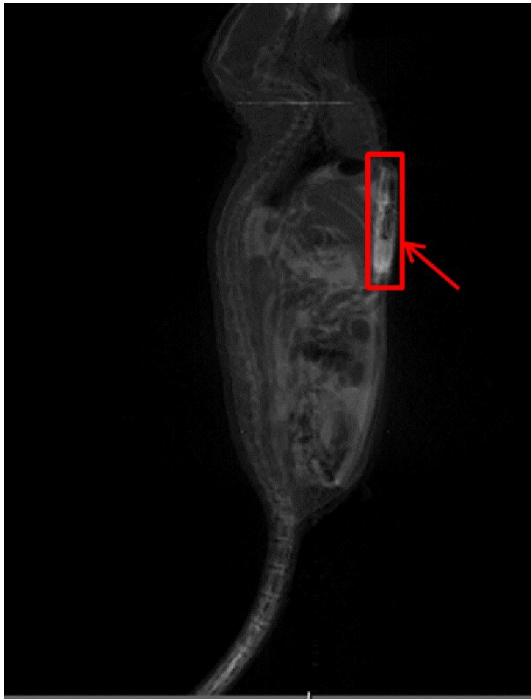

**Figure S15: CT image.**
